# Supplementary material
Source: Springer Nature journal article supplement (https://www.springermedizin.de/resource/supplementary/12889_2012_5342_MOESM1_ESM.pdf/9494872)

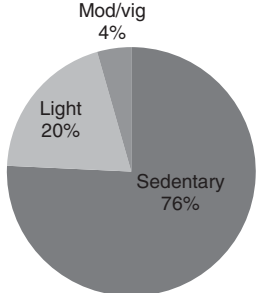

**(a) Work day**

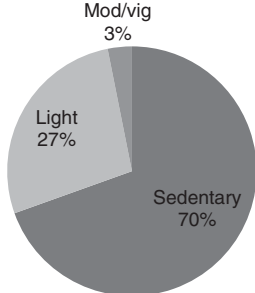

**(b) Non-work day**

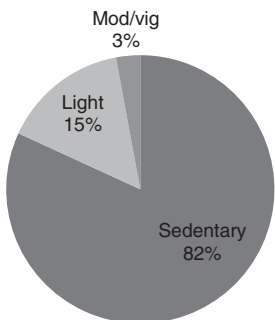

**(c) Work hours on work day**

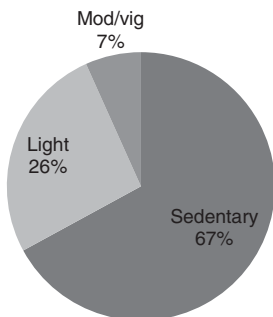

**(d) Non-work hours on work day**

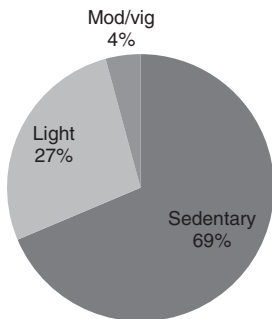

**(e) Total Non-work**

Supplement: MOESM1 [file 9494872]
